# Supplementary material
Source: MDPI journal article supplement (https://www.mdpi.com/1999-4907/14/12/2321)
Supplement: s1 [file s1]

## Article

# Effects of Climate Change and Fire on the Middle and Late Holocene Forest History in Yenisei Siberia

Elena Novenko <sup>1,2</sup>, Olga Rudenko <sup>3</sup>, Natalia Mazei <sup>2</sup>, Dmitriy Kupriyanov <sup>1,4</sup>, Rodion Andreev <sup>2</sup>, Anton Shatunov <sup>1</sup>, Maria Kusilman <sup>5</sup>, Anatoly Prokushkin <sup>6,7</sup> and Alexander Olchev <sup>8,\*</sup>

<sup>1</sup> Department of Quaternary Paleogeography, Institute of Geography of the Russian Academy of Sciences, Staromonetny lane, 29, Moscow 119017, Russia; eynovenko@igras.ru or lenanov@mail.ru (E.N.); dmitriy Kupriyanov1994@yandex.ru (D.K.); toxavilli@yandex.ru (A.S.)

<sup>2</sup> Department of Physical Geography and Landscape Science, Faculty of Geography, Lomonosov Moscow State University, GSP-1, Leninskie Gory, 1, Moscow 119991, Russia; natashamazei@mail.ru (N.M.); dorionio40@gmail.com (R.A.)

<sup>3</sup> Department of Geography, Ecology and General Biology, Orel State University Named After I.S. Turgenev, Komsomol'skaya Str., 95, Orel 302026, Russia; olrudenko2011@yandex.ru

<sup>4</sup> Context Anthropology Laboratory, Institute of Archaeology of the Russian Academy of Sciences, Dmitriya Ulyanova St., 19, Moscow 117292, Russia

<sup>5</sup> Department of Cartography and Geoinformatics, Faculty of Geography, Lomonosov Moscow State University, GSP-1, Leninskie Gory, 1, Moscow 119991, Russia; kusilman@rambler.ru

<sup>6</sup> Laboratory of Biogeochemical Cycles in Forest Ecosystems, V.N. Sukachev Institute of Forest SB RAS, Federal Research Center "Krasnoyarsk Science Center SB RAS", Akademgorodok 50/28, Krasnoyarsk 660036, Russia; prokushkin@ksc.krasn.ru

<sup>7</sup> School of Ecology and Geography, Siberian Federal University, Svobodny av., 79, Krasnoyarsk 660041, Russia

<sup>8</sup> Department of Meteorology and Climatology, Faculty of Geography, Lomonosov Moscow State University, GSP-1, Leninskie Gory, 1, Moscow 119991, Russia

\* Correspondence: aoltche@yandex.ru or aoltche@gmail.com

## Supplementary Materials

### S1. R Code for the modern analogue technique

```
# Package loading
```

```
library('analogue')
```

```
library('readxl')
```

```
library('tidyverse')
```

```
## This script does reconstruction using 'analogue' package by G.L. Simpson.
```

```
## method is Modern Analogue Technique (MAT) or best modern analogues (BMA).
```

```
## Training set is in variable "modern", which has pollen spectra, prediction
```

```
## set is in variable "fossil", which contains fossil spectra.
```

```
## Environmental parameters are in "parameters_modern". For column naming and
```

```
## to provide multiple parameters (working by cycle operator) vector
## "parameters_types" is loaded.
## Variable "mat" contains reconstructed parameters.

# Prediction set loading (example for data, used for Igarka reconstruction)
fossil = read_excel('%FilePath%') |>
  # Following transformations are specific for used data (needs to transpose)
  gather(variable, value, -depth) |>
  spread(depth, value) |>
  transform(variable = as.numeric(variable)) |>
  arrange(variable)

# Modern data (testing set)
modern = read_excel('%FilePath%') |>
  as.data.frame() |>
  arrange(points)

# Parameters
# Woody cover
cover = read_excel('%FilePath%') |>
  as.data.frame() |>
  arrange(points)

# Climate
climate = read_excel('%FilePath%') |>
  arrange(points)

# Column names switching (it's better if they will be identical)
row.names(modern) = modern$points
row.names(fossil) = fossil$variable
colnames(fossil) = colnames(modern)
```

```
# Creating data frame with modern parameters

parameters_modern = semi_join(climate, modern, by = 'points') |>
inner_join(cover)

# Ages loading (they are separated from initial spectra data )
ages = read_excel('%FilePath%', col_names = F) |>
pull()

# Data frames join
dat = join(modern, fossil, verbose = T)

# For MAT data needs to be proportional
modern = dat$modern / 100
fossil = dat$fossil / 100
set.seed(1234)

# MAT transfer function
# Transfer function & leave-one-out (LOO) or bootstrap cross-validation (CV)
i = 0 # Increment
mat = data.frame(ages) # Data frame creation

# Cycle operator provides
for (i in 1:length(parameters_types)){
  # Parameter loading into vector
  parameter = pull(parameters_modern, var = parameters_types[i])

  func_mat = mat(modern, parameter,
  method = "SQchord") # Transfer function
  mat_boot = bootstrap(func_mat, n.boot = 100) # Bootstrap CV (not used) recon_mat = predict(func_mat, fossil,
  k = getK(func_mat)) # Prediction, k gets from LOO CV
```

```
# Fitted values extraction in vector variable
```

```
parameter1 = recon_mat[["predictions"]][["model"]][["predicted"]][func_mat[["standard"]][["k"],]
```

```
mat = cbind(mat, parameter1)
```

```
# Parameter-specific column names
```

```
colnames(mat)[length(mat)] = paste0(parameters_types[i], '.mat')
```

```
}
```
